# Supplementary material for: Qualitative analysis and optical soliton solutions galore: scrutinizing the (2+1)-dimensional complex modified Korteweg-de Vries system of equations
Source: Research Square preprint supplement (doi:10.21203/rs.3.rs-4373006/v1), 2024-05-15
Supplement: Supplementary file 1 [file fc39cae1ad5581da39f6e274.docx]

**Highlights**

- The (2+1) dimensional cmKdV system of equations is studied.
- A new version of the generalized exponential rational function method is used.
- This method uncovers analytical solutions, including exponential function, singular periodic wave, combo trigonometric, shock wave, singular soliton, and hyperbolic solutions in mixed form.
- The planar dynamical system of the concerned equation is created, all probable phase portraits are given, and sensitive inspection is applied to check the sensitivity of the considered equation. Furthermore, after adding a perturbed term, chaotic and quasi-periodic behaviors have been observed for different values of parameters, and multistability is reported at the end.
